# Supplementary material for: Array-based specific classification of bacterial species via hydrophilic/hydrophobic biosensors
Source: Royal Society of Chemistry journal article supplement (doi:10.1039/d4tc02223h), 2024-01-01
Supplement: d4tc02223h1.pdf [file d4tc02223h1.pdf]

## Supporting Information

### Array-based specific classification of bacterial species via hydrophilic/hydrophobic biosensors

Xizhe Li,<sup>a,‡</sup> Pengxin Xue,<sup>a,‡</sup> Haoyu Wang,<sup>a</sup> Haojie Li,<sup>a</sup> Ruolan Du,<sup>b</sup> Jie Gao,<sup>a\*</sup> Kwok-Yin Wong,<sup>b</sup> and Yong Qin<sup>a</sup>

<sup>a</sup> *Interdisciplinary Research Center of Biology & Catalysis, School of Life Sciences, Northwestern Polytechnical University, Xi'an 710072, China*

<sup>b</sup> *State Key Laboratory of Chemical Biology and Drug Discovery, Department of Applied Biology and Chemical Technology, The Hong Kong Polytechnic University, Hung Hom, Kowloon, Hong Kong SAR, China*

\*Corresponding author: Jie Gao (jgao@nwpu.edu.cn)

‡These authors contributed equally to this work.

#### Table of Contents

1. Chemical structure of ligands
2. Detailed information of the ligands
3. Detailed information of the bacteria
4. The dosage of various ligands in the synthesis process of AuNCs
5. Characterization of AuNCs
6. Fluorescent response patterns
7. HCA and OPLS-DA results
8. Misclassification table and VIP values of OPLS-DA

## 1. Chemical structure of ligands

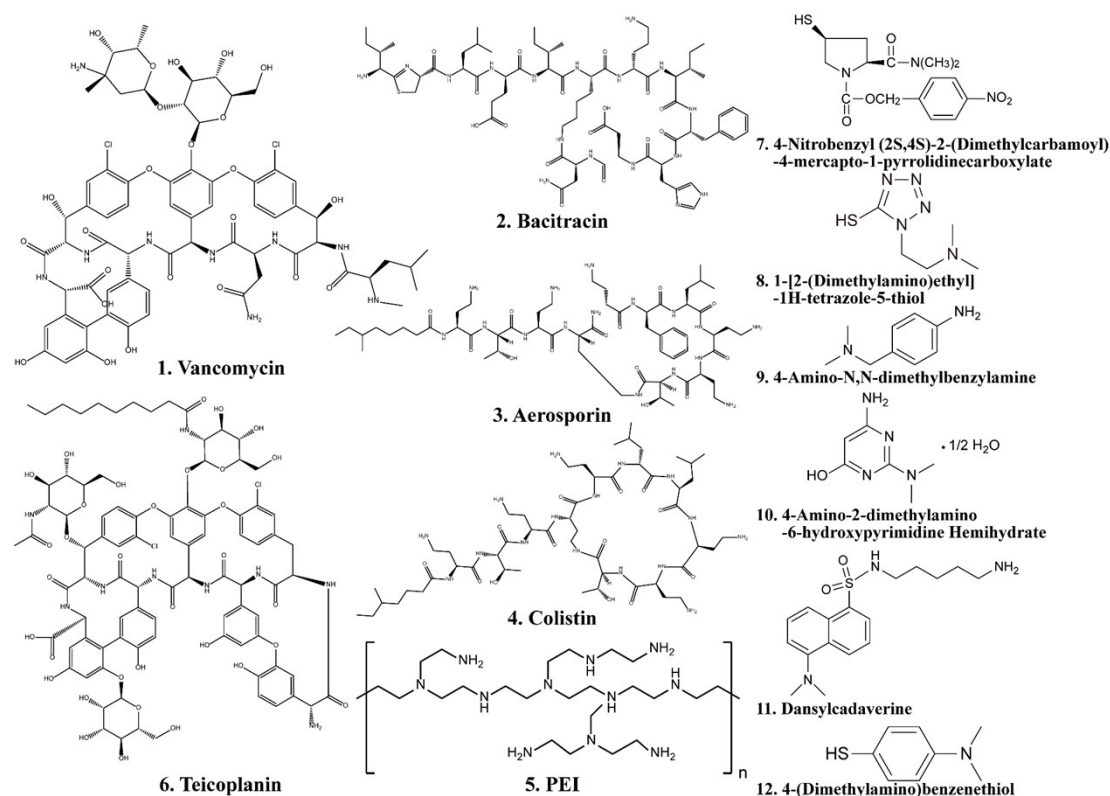

Figure S1. Chemical structure of the 12 ligands.

## 2. Detailed information of the ligands

Table S1. Detailed chemical information of the 12 ligands.

| No | Compound                                                                        | CAS number | Molecular mass | Molecular formula                                                              | logP* | Name of synthesized AuNCs <sup>#</sup> |
|----|---------------------------------------------------------------------------------|------------|----------------|--------------------------------------------------------------------------------|-------|----------------------------------------|
| 1  | Vancomycin                                                                      | 1404-93-9  | 1485.71        | C <sub>66</sub> H <sub>76</sub> Cl <sub>3</sub> N <sub>9</sub> O <sub>24</sub> | -1.44 | Vanco@AuNCs                            |
| 2  | Bacitracin                                                                      | 1405-87-4  | 1422.69        | C <sub>66</sub> H <sub>103</sub> N <sub>17</sub> O <sub>16</sub> S             | -2.21 | Bacit@AuNCs                            |
| 3  | Aerosporin (Polymyxin B)                                                        | 1405-20-5  | 1301.6         | C <sub>56</sub> H <sub>100</sub> N <sub>16</sub> O <sub>17</sub> S             | -3.4  | Acros@AuNCs                            |
| 4  | Colistin (Polymyxin E)                                                          | 1264-72-8  | 1155.43        | C <sub>52</sub> H <sub>98</sub> N <sub>16</sub> O <sub>13</sub>                | -3.68 | Colistin@AuNCs                         |
| 5  | PEI (Polyethylenimine)                                                          | 9002-98-6  | ~1800          | (CH <sub>2</sub> CH <sub>2</sub> NH) <sub>n</sub>                              | -5.41 | PEI@AuNCs                              |
| 6  | Teicoplanin                                                                     | 61036-62-2 | 1709.39        | C <sub>88</sub> H <sub>97</sub> Cl <sub>2</sub> N <sub>9</sub> O <sub>33</sub> | 0.4   | Teico@AuNCs                            |
| 7  | 4-Nitrobenzyl (2S,4S)-2-(Dimethylcarbamoyl)-4-mercapto-1-pyrrolidinecarboxylate | 96034-64-9 | 353.39         | C <sub>15</sub> H <sub>19</sub> N <sub>3</sub> O <sub>5</sub> S                | 0.5   | DMC-P@AuNCs                            |
| 8  | 1-[2-(Dimethylamino)ethyl]-1H-tetrazole-5-thiol                                 | 61607-68-9 | 173.24         | C <sub>3</sub> H <sub>11</sub> N <sub>5</sub> S                                | 0.28  | DMAE-T@AuNCs                           |
| 9  | 4-Amino-N,N-dimethylbenzylamine                                                 | 6406-74-2  | 150.2          | C <sub>9</sub> H <sub>14</sub> N <sub>2</sub>                                  | 0.7   | DMA-BA@AuNCs                           |
| 10 | 4-Amino-2-dimethylamino-6-hydroxypyrimidine Hemihydrate                         | 76750-84-0 | 154.17         | C <sub>6</sub> H <sub>10</sub> N <sub>4</sub> O                                | -1.54 | DMA-HP@AuNCs                           |
| 11 | Dansylcadaverine (N-(Dimethyl-amino-naphthalene-sulfonyl)-1,5-pentane-diamine)  | 10121-91-2 | 335.46         | C <sub>17</sub> H <sub>25</sub> N <sub>3</sub> O <sub>2</sub> S                | 2.83  | DMA-N@AuNCs                            |
| 12 | 4-(Dimethylamino)benzenethiol                                                   | 4946-22-9  | 153.24         | C <sub>8</sub> H <sub>11</sub> NS                                              | 2.63  | DMA-BT@AuNCs                           |

\*Predicted data is generated using the ACD/Labs Percepta Platform-PhysChem Module.

<sup>#</sup>The hydrophilic ligands were designated by a few letters or abbreviations of the chemical name; the hydrophobic ligands were denoted by utilizing the abbreviation for the dimethylamino group attached to the chemical scaffold.

### 3. Detailed information of the bacteria

Table S2. Detailed information of the 17 kinds of bacteria.

| No | Name of bacteria                                   | Abbreviation            | Gram species | Strains      | Zeta potential |
|----|----------------------------------------------------|-------------------------|--------------|--------------|----------------|
| 1  | <i>Staphylococcus aureus</i> 1                     | <i>S. aureus</i> 1      | positive     |              | -28.34±0.79    |
| 2  | <i>Staphylococcus aureus</i> 2                     | <i>S. aureus</i> 2      | positive     |              | -33.30±0.73    |
| 3  | <i>Staphylococcus aureus</i> 3                     | <i>S. aureus</i> 3      | positive     |              | -29.67±0.52    |
| 4  | Methicillin-resistant <i>Staphylococcus aureus</i> | MRSA                    | positive     |              | -28.58±1.21    |
| 5  | <i>Listeria monocytogenes</i>                      | <i>L. monocytogenes</i> | positive     |              | -30.74±0.78    |
| 6  | <i>Enterococcus faecalis</i>                       | <i>E. faecalis</i>      | positive     |              | -33.76±0.50    |
| 7  | <i>Bacillus subtilis</i>                           | <i>B. subtilis</i>      | positive     |              | -28.84±1.56    |
| 8  | <i>Streptococcus mutans</i>                        | <i>S. mutans</i>        | positive     |              | -30.16±1.41    |
| 9  | <i>Escherichia coli</i>                            | <i>E. coli</i>          | negative     |              | -31.50±1.75    |
| 10 | <i>Escherichia coli</i>                            | <i>E. coli</i> 1        | negative     | CMCC(B)44102 | -35.00±1.02    |
| 11 | <i>Escherichia coli</i> BL21                       | <i>E. coli</i> BL21     | negative     | BL21         | -27.99±0.86    |
| 12 | <i>Pseudomonas aeruginosa</i>                      | <i>P. aeruginosa</i>    | negative     |              | -30.33±0.70    |
| 13 | <i>Pseudomonas fluorescens</i>                     | <i>P. fluorescens</i>   | negative     |              | -30.32±0.97    |
| 14 | <i>Salmonella paratyphi</i> B                      | <i>S. paratyphi</i> B   | negative     |              | -9.38±0.57     |
| 15 | <i>Shigella flexneri</i>                           | <i>Sh. flexneri</i>     | negative     |              | -19.10±0.32    |
| 16 | <i>Enterobacter sakazakii</i>                      | <i>E. sakazakii</i>     | negative     |              | -22.80±1.73    |
| 17 | <i>Enterobacter cloacae</i>                        | <i>E. cloacae</i>       | negative     |              | -24.67±1.33    |

### 4. The dosage of various ligands in the synthesis process of AuNCs

Table S3. Detailed dosage of each compound

| Compound                                                                        | Volume (μL) | Concentration |
|---------------------------------------------------------------------------------|-------------|---------------|
| HAuCl <sub>4</sub> solution                                                     | 435         | 24 mM         |
| GSH aqueous solution                                                            | 150         | 100 mM        |
| Ultrapure water                                                                 | 4415        | -             |
| Vancomycin                                                                      | 200         | 1% w/w        |
| Bacitracin                                                                      | 200         | 1% w/w        |
| Aerosporin (Polymyxin B)                                                        | 200         | 1% w/w        |
| Colistin (Polymyxin E)                                                          | 200         | 1% w/w        |
| PEI (Polyethyleneimine)                                                         | 100         | 1% w/w        |
| 4-Nitrobenzyl (2S,4S)-2-(Dimethylcarbamoyl)-4-mercapto-1-pyrrolidinecarboxylate | 30          | 100 mM        |
| 1-[2-(Dimethylamino)ethyl]-1H-tetrazole-5-thiol                                 | 15          | 100 mM        |
| 4-Amino-N,N-dimethylbenzylamine                                                 | 30          | 100 mM        |
| 4-Amino-2-dimethylamino-6-hydroxypyrimidine Hemihydrate                         | 30          | 100 mM        |
| Dansylcadaverine (N-(Dimethyl-amino-naphtha-lene-sulfonyl)-1,5-pentane-diamine) | 75          | 100 mM        |
| 4-(Dimethylamino)benzenethiol                                                   | 10          | 100 mM        |

## 5. Characterization of AuNCs

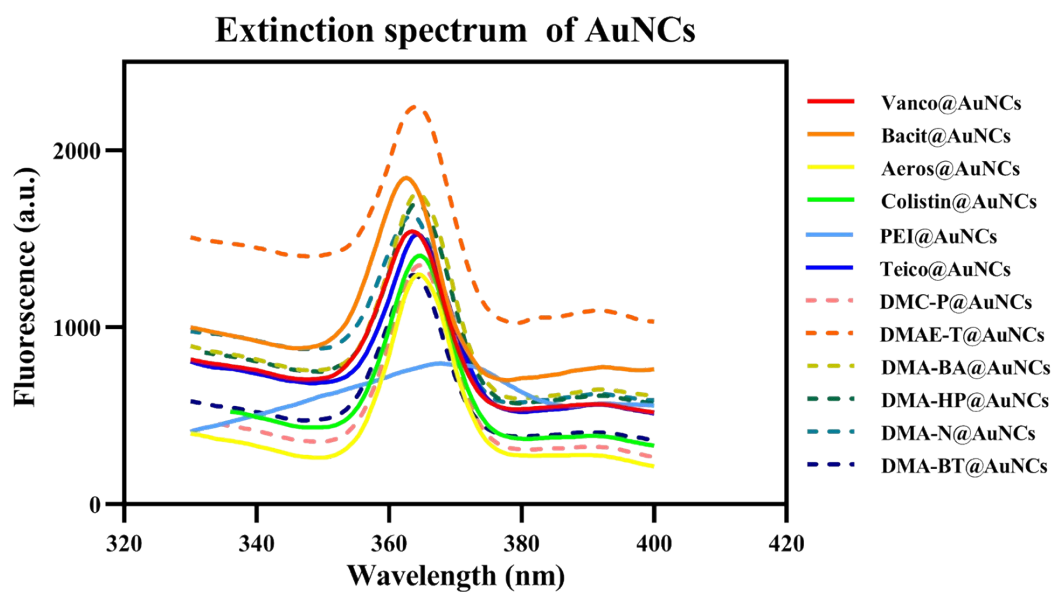

Figure S2. Extinction spectrum of AuNCs with hydrophilic and hydrophobic ligands, respectively.

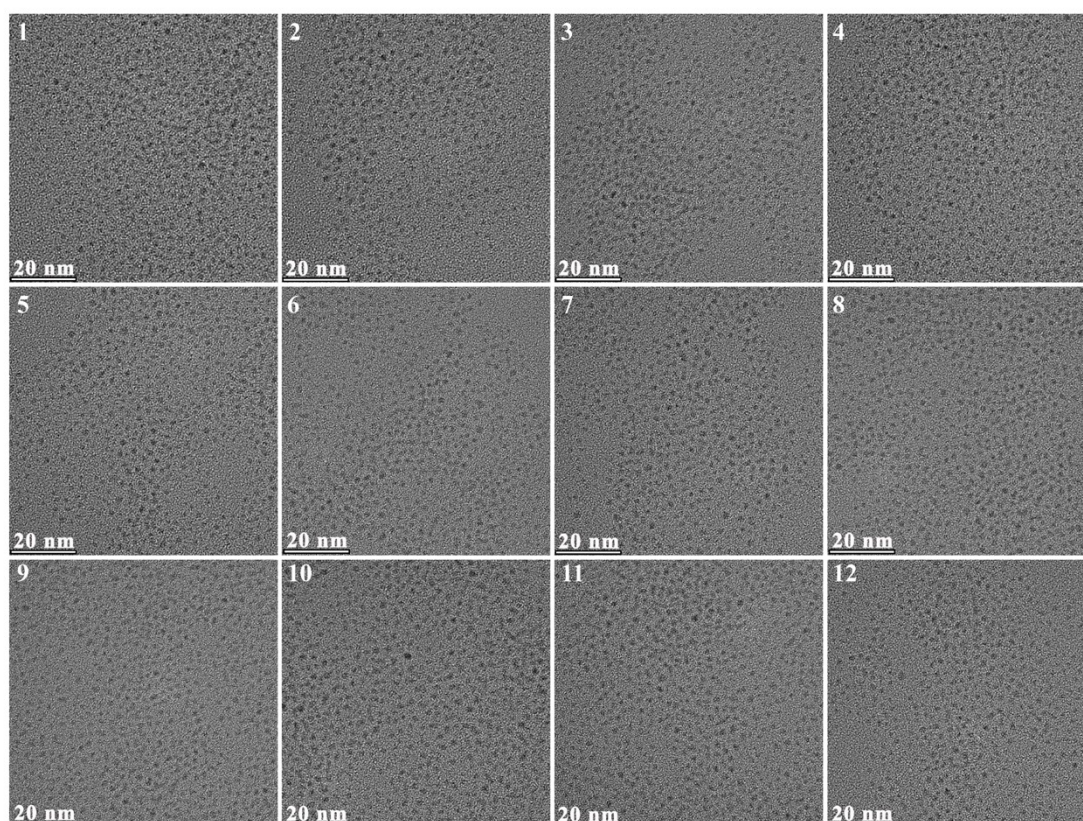

Figure S3. TEM imaging of the synthesized AuNCs

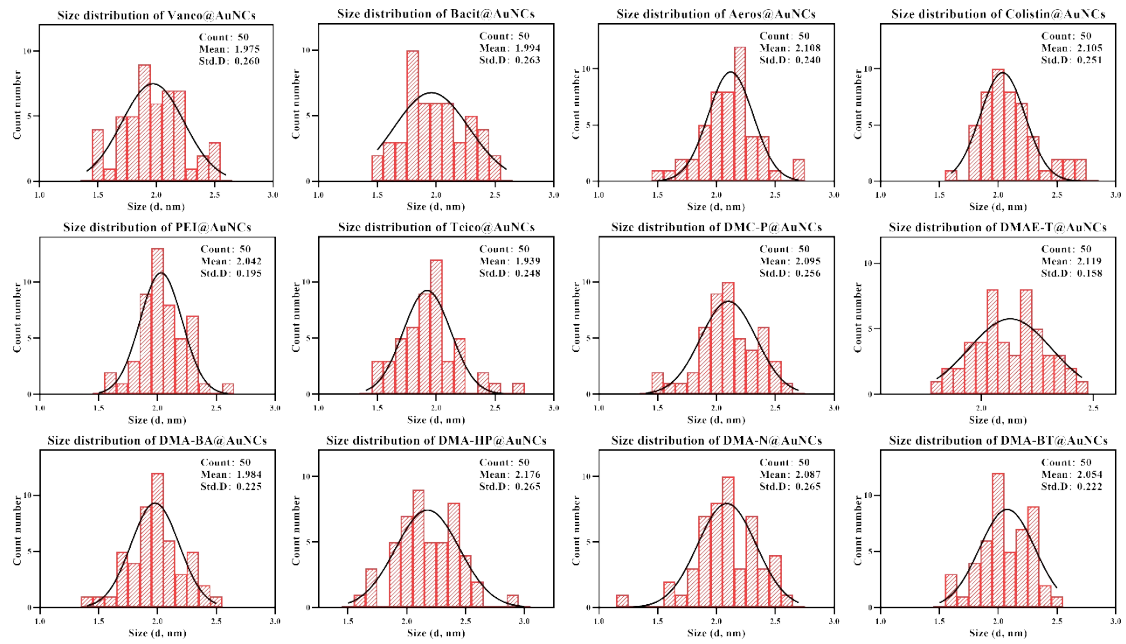

Figure S4. Size distribution of the AuNCs.







Table S7. Fluorescent response patterns of training set in the detection of mixed bacteria.

|                | Vanco@AuNCs | Bacti@AuNCs | Aeros@AuNCs | Colistin@AuNCs | PEI@AuNCs | Teico@AuNCs | DMC-P@AuNCs | DMAE-T@AuNCs | DMA-BA@AuNCs | DMA-HP@AuNCs | DMA-N@AuNCs | DMA-BT@AuNCs |
|----------------|-------------|-------------|-------------|----------------|-----------|-------------|-------------|--------------|--------------|--------------|-------------|--------------|
| 3+4            | -1.935      | -1.168      | -0.087      | 6.774          | -2.191    | 11.483      | -6.971      | -5.154       | 1.981        | -28.093      | -3.742      | -9.471       |
| 3+4            | -0.998      | 5.371       | 0.370       | 7.532          | 0.211     | 9.192       | -13.388     | -0.301       | -5.521       | -25.532      | -2.121      | -5.095       |
| 3+4            | -0.964      | -1.200      | -1.023      | 6.870          | 3.894     | 12.318      | -3.196      | -1.856       | 0.538        | -25.918      | -4.347      | 1.535        |
| 3+4            | 0.087       | 5.928       | 0.264       | 7.500          | 4.410     | 10.293      | -0.107      | 1.731        | 0.111        | -18.076      | -1.755      | -4.575       |
| 3+4            | -2.594      | -2.190      | -6.962      | 1.795          | -0.303    | 10.423      | -8.811      | -12.911      | -7.483       | -38.567      | -11.165     | -3.570       |
| 3+4            | -2.816      | -5.433      | -6.182      | -1.411         | 0.873     | 9.855       | -8.827      | -10.972      | -9.613       | -35.244      | -8.296      | -11.803      |
| 4+7            | 7.505       | -9.659      | -4.431      | -9.032         | 0.206     | 4.223       | 2.297       | -4.929       | -2.831       | -34.916      | -12.526     | -26.496      |
| 4+7            | 7.730       | -8.266      | -7.163      | -8.283         | -1.146    | 2.801       | 2.359       | -3.999       | -4.357       | -38.339      | -11.331     | -26.189      |
| 4+7            | 8.156       | -6.521      | -5.442      | -6.709         | 3.621     | 4.469       | 3.773       | -3.400       | 1.828        | -29.664      | -10.770     | -20.731      |
| 4+7            | 6.638       | -5.638      | -7.854      | -6.674         | 2.667     | 2.943       | 4.920       | -0.684       | -8.973       | -30.602      | -9.547      | -22.569      |
| 4+7            | 10.851      | 0.028       | 1.447       | -2.198         | -1.451    | 1.964       | 3.078       | 5.325        | 11.077       | -24.618      | -0.952      | -23.729      |
| 4+7            | 10.432      | -2.377      | -0.903      | -2.702         | -2.295    | 1.995       | -3.580      | 7.953        | 4.335        | -23.900      | 0.475       | -23.654      |
| 7+8            | -3.179      | -0.261      | -2.890      | -2.633         | 0.263     | -1.342      | 12.308      | -17.967      | 12.617       | 7.009        | -13.739     | -5.047       |
| 7+8            | -1.448      | -0.155      | -1.586      | -2.289         | 0.217     | -5.184      | 9.936       | -22.805      | 11.299       | 7.049        | -13.774     | -2.157       |
| 7+8            | -0.964      | 0.374       | -2.191      | -0.625         | 0.489     | -4.368      | 15.292      | -9.567       | 18.770       | 10.392       | -10.973     | -0.317       |
| 7+8            | 1.300       | 2.005       | 0.356       | 0.515          | 0.978     | -3.811      | 9.580       | -10.918      | 4.754        | 8.582        | -2.006      | 2.475        |
| 7+8            | -6.318      | -8.679      | -9.846      | -3.115         | 0.799     | -3.041      | 7.295       | -26.285      | 7.614        | -3.722       | -15.995     | -2.476       |
| 7+8            | -5.652      | -12.741     | -7.835      | -2.569         | 0.786     | -2.550      | 7.979       | -21.977      | -9.624       | -9.855       | -20.624     | 2.681        |
| 11+14          | -10.402     | 4.896       | 3.340       | -2.833         | 3.793     | -7.500      | 4.318       | 1.675        | 1.232        | -6.932       | -14.181     | -4.576       |
| 11+14          | -6.889      | 3.533       | 3.215       | -4.233         | 0.603     | -8.502      | 10.078      | -0.995       | 2.492        | -0.065       | -15.908     | -3.502       |
| 11+14          | -6.089      | 3.622       | 3.422       | -4.390         | 3.783     | -7.310      | 8.293       | 8.049        | 6.891        | 1.401        | -12.723     | 0.087        |
| 11+14          | -8.774      | 5.205       | 0.890       | -0.926         | 2.657     | -7.011      | 14.469      | 2.118        | 13.967       | 4.842        | -13.933     | 2.034        |
| 11+14          | -11.408     | -7.909      | -4.014      | -6.996         | 3.227     | -4.118      | 9.219       | -5.083       | -3.280       | -13.825      | -23.840     | -5.124       |
| 11+14          | -11.566     | -3.726      | -8.127      | -6.579         | 0.286     | -6.018      | 8.935       | -2.820       | -2.288       | -9.697       | -22.373     | -5.636       |
| 15+16          | -19.769     | -6.301      | -3.239      | 0.284          | -0.868    | -12.369     | 6.326       | -8.629       | -4.511       | -35.378      | -4.850      | 0.205        |
| 15+16          | -18.730     | -2.375      | -4.502      | 1.154          | 0.057     | -13.837     | 1.602       | -9.703       | -6.161       | -33.080      | -5.683      | 0.143        |
| 15+16          | -14.005     | -2.163      | -2.353      | 2.426          | 0.282     | -10.592     | 10.198      | -4.325       | 1.499        | -27.466      | -2.459      | 6.434        |
| 15+16          | -20.296     | 1.330       | -4.600      | 2.457          | 1.120     | -11.378     | 9.785       | -0.442       | -2.425       | -26.256      | -4.792      | 4.575        |
| 15+16          | -24.319     | -7.546      | -8.204      | -1.706         | -0.370    | -9.690      | 2.654       | -18.235      | -5.098       | -45.742      | -7.159      | 4.857        |
| 15+16          | -25.058     | -8.566      | -9.340      | -1.151         | 0.614     | -10.395     | 3.256       | -15.677      | -10.599      | -45.657      | -11.842     | -2.895       |
| 11+16          | -0.468      | -7.695      | -11.002     | 1.064          | -5.012    | -3.518      | -1.486      | -26.598      | -2.856       | -50.072      | -13.599     | -4.146       |
| 11+16          | -0.088      | -2.713      | -13.294     | 2.860          | 0.195     | -1.413      | -0.291      | -26.317      | -1.529       | -51.102      | -17.383     | -4.512       |
| 11+16          | -0.008      | -4.396      | -10.101     | 1.766          | 2.614     | 0.461       | 3.657       | -22.717      | 3.645        | -39.454      | -11.163     | 6.425        |
| 11+16          | -0.106      | -3.619      | -11.651     | 2.520          | -1.679    | -0.217      | 5.589       | -20.491      | -12.892      | -44.053      | -15.137     | -0.864       |
| 11+16          | 1.102       | -2.953      | -6.649      | 3.241          | -4.788    | -5.746      | 3.307       | -20.232      | 8.075        | -34.920      | -9.054      | -6.185       |
| 11+16          | -0.440      | -2.576      | -6.547      | 4.128          | -1.082    | -5.300      | -1.968      | -14.498      | -3.011       | -37.373      | -8.207      | -7.065       |
| 4+14           | -18.819     | -1.080      | -5.606      | 2.893          | -1.670    | 11.786      | 18.259      | 1.675        | 11.541       | -4.938       | 5.569       | 11.603       |
| 4+14           | -15.340     | -5.740      | -5.104      | 0.880          | -4.101    | 9.712       | 17.260      | 1.842        | 5.129        | -6.164       | 4.777       | 10.798       |
| 4+14           | -14.548     | -6.664      | -3.334      | 3.072          | 0.176     | 12.776      | 18.436      | 2.311        | 6.948        | -5.059       | 6.361       | 11.650       |
| 4+14           | -15.730     | -7.627      | -2.680      | 0.406          | -2.108    | 10.815      | 18.826      | 1.311        | 6.778        | -5.859       | 4.266       | 10.175       |
| 4+14           | -16.939     | -7.921      | -2.182      | 0.571          | -3.303    | 9.444       | 18.843      | 0.996        | 6.782        | -6.559       | 4.107       | 10.362       |
| 4+14           | -17.494     | -5.735      | -5.025      | 0.152          | 0.165     | 9.344       | 17.802      | -0.005       | 7.205        | -5.705       | 4.802       | 9.900        |
| 7+15           | -9.862      | -5.711      | -12.094     | 5.692          | -6.973    | 10.034      | 17.232      | -12.481      | 7.914        | -13.040      | 5.563       | 9.805        |
| 7+15           | -8.347      | -6.185      | -13.341     | 4.081          | -5.575    | 8.485       | 17.221      | -14.504      | 9.290        | -10.861      | 4.672       | 10.357       |
| 7+15           | -9.169      | -5.845      | -10.362     | 8.715          | -2.673    | 10.717      | 17.065      | -14.434      | 8.597        | -11.127      | 5.568       | 10.969       |
| 7+15           | -7.901      | -7.078      | -6.294      | 5.910          | -2.316    | 10.914      | 17.333      | -16.737      | 7.674        | -12.146      | 5.143       | 10.414       |
| 7+15           | -9.279      | -7.903      | -6.125      | 5.151          | -3.299    | 8.803       | 17.272      | -16.278      | 7.366        | -13.596      | 4.489       | 10.081       |
| 7+15           | -8.498      | -7.816      | -8.414      | 5.251          | -10.266   | 9.865       | 16.974      | -13.730      | 7.252        | -12.844      | 5.022       | 10.021       |
| 8+16           | -34.233     | 0.157       | -2.970      | -14.277        | -9.012    | -9.147      | 18.758      | 9.990        | 4.518        | 3.526        | 5.679       | 10.746       |
| 8+16           | -32.526     | 1.502       | -3.045      | -11.359        | -9.596    | -9.138      | 18.373      | 13.443       | 3.106        | 3.083        | 6.040       | 11.111       |
| 8+16           | -32.591     | -2.608      | -4.483      | -14.525        | -2.399    | -3.910      | 18.833      | 14.196       | 6.848        | 3.547        | 6.043       | 11.507       |
| 8+16           | -34.933     | 1.164       | -9.738      | -18.746        | -3.387    | -4.727      | 17.532      | 13.303       | 7.479        | 3.803        | 6.199       | 10.964       |
| 8+16           | -36.971     | -0.012      | -10.571     | -21.178        | -9.714    | -8.494      | 18.013      | 13.404       | 7.373        | 2.898        | 5.510       | 11.153       |
| 8+16           | -35.636     | 0.075       | -9.192      | -18.031        | -9.646    | -8.444      | 19.976      | 11.433       | 5.439        | 3.212        | 5.201       | 10.491       |
| 3+4+7+11+14+15 | 4.841       | -8.523      | -22.857     | 1.758          | -10.680   | 18.620      | 16.803      | -9.142       | 8.760        | 6.020        | 2.496       | 3.439        |
| 3+4+7+11+14+15 | 4.648       | -9.234      | -22.279     | 1.774          | -9.232    | 18.623      | 16.677      | -6.325       | 7.071        | 6.316        | 3.494       | 6.391        |
| 3+4+7+11+14+15 | 7.559       | -6.707      | -23.922     | 3.276          | -3.179    | 18.035      | 16.538      | -8.142       | 7.858        | 6.738        | 2.985       | 3.364        |
| 3+4+7+11+14+15 | 6.110       | -6.005      | -23.635     | 6.120          | -3.856    | 19.632      | 17.011      | -12.383      | 9.042        | 8.457        | 4.580       | 5.495        |
| 3+4+7+11+14+15 | 5.276       | -6.673      | -24.580     | 3.560          | -9.838    | 18.965      | 16.502      | -13.994      | 7.395        | 5.666        | 3.718       | 5.292        |
| 3+4+7+11+14+15 | 5.591       | -7.801      | -24.998     | 4.459          | -8.035    | 19.453      | 17.200      | -10.322      | 7.785        | 6.409        | 3.408       | 4.634        |



Table S9. Fluorescent response patterns of testing set in the detection of bacterial samples in water.

| No | Verification          | Vimco@AuNCs | Bacit@AuNCs | Aeros@AuNCs | Colistin@AuNCs | PEI@AuNCs | Teico@AuNCs | DMC-P@AuNCs | DMAE-T@AuNCs | DMA-BA@AuNCs | DMA-HP@AuNCs | DMA-N@AuNCs | DMA-BT@AuNCs |
|----|-----------------------|-------------|-------------|-------------|----------------|-----------|-------------|-------------|--------------|--------------|--------------|-------------|--------------|
| 1  | <i>S. aureus</i> 1    | 2.665       | -1.850      | -1.037      | -11.038        | -0.892    | 3.946       | 17.340      | -7.828       | -9.794       | -2.800       | -17.467     | 0.618        |
| 2  | <i>S. aureus</i> 1    | 2.552       | -0.712      | -1.906      | -7.538         | -2.255    | 2.691       | 16.754      | 7.564        | -14.266      | 9.923        | -8.720      | -3.773       |
| 3  | <i>S. aureus</i> 2    | 2.560       | -1.169      | -1.910      | -5.443         | -2.599    | 4.568       | -7.672      | 2.161        | 3.144        | -0.057       | 2.294       | -5.778       |
| 4  | <i>S. aureus</i> 2    | 2.250       | -2.102      | -4.826      | -7.165         | -4.079    | 3.664       | -11.968     | -7.778       | -12.232      | -9.811       | -5.012      | -11.998      |
| 5  | <i>S. aureus</i> 3    | -7.106      | -3.478      | -4.724      | -15.310        | -1.448    | 2.804       | 2.327       | -4.270       | -7.747       | -37.291      | 2.584       | -11.016      |
| 6  | <i>S. aureus</i> 3    | -5.775      | -4.430      | -4.026      | -13.070        | -2.484    | 2.542       | 3.729       | 3.922        | 9.954        | -25.876      | 4.401       | -8.520       |
| 7  | <i>E. faecalis</i>    | 1.246       | -28.963     | -4.424      | -31.951        | -3.088    | 0.234       | 8.950       | 12.511       | -1.169       | 8.164        | 1.919       | -7.983       |
| 8  | <i>E. coli</i>        | -50.202     | -34.814     | -11.102     | -37.780        | -20.524   | -8.411      | -0.052      | 20.483       | 1.164        | 13.940       | 7.023       | 1.841        |
| 9  | <i>E. coli</i>        | -50.286     | -46.618     | -45.480     | -48.768        | -19.256   | -5.998      | 0.208       | 12.775       | -6.835       | 5.050        | 4.349       | 0.449        |
| 10 | <i>E. coli</i> 1      | -84.229     | -49.464     | -26.219     | -29.218        | -15.271   | -7.370      | -0.436      | 0.697        | -5.247       | -4.879       | -30.493     | -0.649       |
| 11 | <i>E. coli</i> 1      | -80.012     | -39.780     | -25.148     | -26.924        | -15.384   | -7.837      | 0.444       | 6.084        | -2.637       | 0.349        | -24.530     | 4.593        |
| 12 | <i>P. aeruginosa</i>  | -17.388     | -37.528     | -25.986     | -35.712        | -21.131   | -19.382     | -12.175     | -24.045      | -2.928       | -13.779      | 0.213       | -7.844       |
| 13 | <i>P. fluorescens</i> | -49.083     | -37.336     | -16.717     | -28.436        | -32.178   | -3.030      | -0.256      | 10.951       | -3.644       | -6.084       | 5.855       | 4.997        |
| 14 | <i>P. fluorescens</i> | -52.383     | -40.071     | -19.862     | -33.096        | -30.555   | -3.203      | -2.457      | 0.594        | -5.898       | -17.209      | 4.593       | 3.395        |
| 15 | <i>Sh. flexneri</i>   | -19.898     | -28.971     | -17.191     | -22.955        | -12.357   | -45.496     | -6.620      | 7.407        | -14.893      | -16.028      | 8.141       | -5.098       |
| 16 | <i>Sh. flexneri</i>   | -18.155     | -29.089     | -17.444     | -30.263        | -11.614   | -41.802     | -10.610     | 1.393        | -34.526      | -26.344      | 4.091       | -2.196       |
| 17 | <i>E. sakazaki</i>    | -58.343     | -23.069     | -12.060     | -54.883        | -8.554    | -40.694     | -2.979      | -8.450       | -3.257       | -20.681      | 4.097       | 2.265        |
| 18 | <i>E. sakazaki</i>    | -59.119     | -19.654     | -9.901      | -52.430        | -11.538   | -42.255     | -1.182      | 4.241        | 1.261        | -15.195      | 7.520       | 1.839        |
| 19 | <i>E. cloacae</i>     | -6.933      | -19.169     | -9.315      | -13.548        | -7.338    | -31.591     | -0.534      | -1.065       | 2.780        | 3.325        | 4.196       | -32.233      |
| 20 | <i>E. cloacae</i>     | -10.399     | -21.231     | -12.569     | -16.911        | -5.542    | -31.966     | -5.796      | -10.916      | -2.434       | -9.514       | 3.489       | -29.891      |

Table S10. Fluorescent response patterns of testing set in the detection of bacterial samples in serum.

| No | Verification          | Vimco@AuNCs | Bacit@AuNCs | Aeros@AuNCs | Colistin@AuNCs | PEI@AuNCs | Teico@AuNCs | DMC-P@AuNCs | DMAE-T@AuNCs | DMA-BA@AuNCs | DMA-HP@AuNCs | DMA-N@AuNCs | DMA-BT@AuNCs |
|----|-----------------------|-------------|-------------|-------------|----------------|-----------|-------------|-------------|--------------|--------------|--------------|-------------|--------------|
| 1  | <i>S. aureus</i> 1    | -38.101     | 1.144       | -12.359     | -11.498        | -10.498   | 2.296       | -0.235      | -1.033       | -51.149      | -8.688       | 3.761       | -3.080       |
| 2  | <i>S. aureus</i> 3    | -30.552     | 6.041       | -1.862      | -3.092         | -4.356    | 4.839       | -1.187      | -2.869       | -29.390      | -1.682       | -2.797      | -2.094       |
| 3  | MRSA                  | -35.468     | 6.490       | 0.766       | -5.659         | -7.301    | 5.009       | -2.723      | 1.123        | -43.690      | -4.577       | -3.515      | -5.587       |
| 4  | MRSA                  | -36.922     | 1.999       | -6.334      | -10.052        | -8.024    | 5.487       | -3.836      | -2.027       | -46.478      | -8.989       | -8.101      | -6.207       |
| 5  | <i>E. faecalis</i>    | -52.285     | 10.326      | -7.562      | -7.852         | -5.316    | 8.697       | -2.460      | -5.390       | -11.578      | -4.422       | -3.949      | -5.162       |
| 6  | <i>E. faecalis</i>    | -53.529     | 6.733       | -13.326     | -9.784         | -5.242    | 8.728       | -3.021      | -6.531       | -54.143      | -5.479       | -8.718      | -4.652       |
| 7  | <i>B. subtilis</i>    | -45.444     | 3.463       | -10.435     | -6.233         | -7.045    | 6.499       | -2.952      | -5.714       | -51.383      | -6.384       | -12.833     | -3.469       |
| 8  | <i>B. subtilis</i>    | -46.169     | 7.029       | -8.938      | -3.713         | -7.399    | 5.911       | -2.287      | -3.191       | -47.321      | -0.718       | -8.268      | -3.663       |
| 9  | <i>S. mutans</i>      | -38.479     | 5.861       | -8.557      | -8.535         | -4.311    | 6.143       | 3.561       | 1.819        | -29.897      | -12.277      | -13.254     | -8.062       |
| 10 | <i>E. coli</i> 1      | -63.462     | -3.332      | -3.689      | -14.039        | -5.631    | 1.916       | 21.743      | 4.565        | -40.213      | -7.788       | -6.823      | 0.957        |
| 11 | <i>E.coli</i> BL21    | -68.436     | -1.969      | -11.778     | -10.369        | -7.128    | 4.833       | 8.141       | 6.447        | -41.287      | -1.004       | -5.134      | -2.218       |
| 12 | <i>E.coli</i> BL21    | -67.169     | -2.931      | -12.581     | -11.181        | -6.912    | 4.590       | 8.012       | 4.633        | -46.793      | -6.313       | -5.659      | -2.819       |
| 13 | <i>P. aeruginosa</i>  | -57.067     | -0.023      | -14.824     | -9.186         | -15.246   | 1.954       | 3.756       | -5.784       | -43.304      | -7.972       | -5.046      | -7.314       |
| 14 | <i>P. aeruginosa</i>  | -59.707     | 0.241       | -14.892     | -7.310         | -15.644   | 1.832       | 3.971       | -4.076       | -36.004      | -3.176       | -5.188      | -8.413       |
| 15 | <i>P. fluorescens</i> | -41.575     | -2.648      | -7.007      | -12.384        | -5.806    | 5.076       | 2.311       | -2.600       | -50.384      | -4.296       | -4.727      | -1.611       |
| 16 | <i>S.paratyphi B</i>  | -56.765     | -5.036      | 8.100       | -11.686        | -6.716    | 2.843       | 4.471       | 0.424        | -47.119      | -21.808      | -8.758      | -1.904       |
| 17 | <i>S.paratyphi B</i>  | -51.109     | -1.701      | 2.876       | -11.510        | -6.443    | 2.406       | 4.729       | 3.202        | -36.788      | -13.180      | -7.552      | -1.350       |
| 18 | <i>Sh. flexneri</i>   | -61.865     | 4.358       | -12.363     | -11.802        | -13.234   | 5.175       | 4.513       | -2.180       | -28.772      | -6.931       | -7.605      | -2.353       |
| 19 | <i>E. cloacae</i>     | -41.433     | 5.829       | -8.822      | -7.620         | -8.559    | 12.960      | 4.255       | 0.759        | -32.552      | -0.722       | -12.247     | -4.601       |
| 20 | <i>E. cloacae</i>     | -45.349     | 5.113       | -10.682     | -8.901         | -8.092    | 12.503      | 3.204       | 0.482        | -38.118      | -6.238       | -13.859     | -3.472       |

Table S11. Fluorescent response patterns of testing set in the detection of bacterial samples in urine.

| No | Verification            | Vimco@AuNCs | Bacit@AuNCs | Aeros@AuNCs | Colistin@AuNCs | PEI@AuNCs | Teico@AuNCs | DMC-P@AuNCs | DMAE-T@AuNCs | DMA-BA@AuNCs | DMA-HP@AuNCs | DMA-N@AuNCs | DMA-BT@AuNCs |
|----|-------------------------|-------------|-------------|-------------|----------------|-----------|-------------|-------------|--------------|--------------|--------------|-------------|--------------|
| 1  | <i>S. aureus</i> 3      | -1.560      | -3.111      | -1.735      | -0.026         | -0.466    | -0.746      | 0.886       | -12.216      | 1.935        | 0.489        | -1.758      | -4.070       |
| 2  | <i>S. aureus</i> 3      | -0.938      | -0.011      | 0.854       | 0.587          | -0.257    | -0.807      | 0.378       | -10.022      | 7.634        | 5.780        | -2.526      | -5.761       |
| 3  | MRSA                    | -1.540      | 1.600       | -1.689      | -5.585         | 0.570     | -2.699      | 0.178       | -0.570       | -10.479      | 1.721        | -3.461      | -3.495       |
| 4  | MRSA                    | -2.584      | -1.125      | -3.729      | -6.938         | 0.398     | -2.831      | -0.332      | -2.638       | -21.144      | 0.118        | -3.987      | -3.709       |
| 5  | <i>L. monocytogenes</i> | -1.530      | 0.752       | -3.369      | 1.547          | 1.923     | -0.320      | -2.850      | -2.331       | 1.524        | 2.360        | -1.959      | -3.680       |
| 6  | <i>L. monocytogenes</i> | -2.951      | 1.619       | -1.655      | 1.623          | 1.112     | -0.479      | -1.868      | -1.773       | 2.009        | 3.422        | -2.065      | -3.927       |
| 7  | <i>E. faecalis</i>      | -0.628      | -0.248      | -0.989      | -0.161         | -3.302    | 0.196       | 0.247       | 0.505        | 4.151        | 5.135        | -0.334      | -2.959       |
| 8  | <i>E. faecalis</i>      | -3.055      | -0.784      | -5.353      | -1.784         | -3.795    | -0.663      | -2.204      | -0.618       | 1.003        | 3.717        | -1.064      | -3.050       |
| 9  | <i>S. mutans</i>        | 1.675       | 1.700       | -4.029      | -5.302         | -1.788    | 1.832       | 2.692       | 2.784        | 2.460        | 4.274        | 1.483       | -1.581       |
| 10 | <i>E. coli</i>          | -1.444      | 2.513       | -9.945      | -0.907         | -1.373    | -8.423      | 5.326       | 6.473        | 2.614        | 6.613        | 0.196       | 2.058        |
| 11 | <i>E. coli</i>          | -4.399      | -0.502      | -11.637     | -5.687         | -0.734    | -8.186      | 3.688       | -1.195       | 0.225        | 4.465        | -0.309      | 1.784        |
| 12 | <i>P. aeruginosa</i>    | -3.528      | -5.016      | -4.414      | -1.404         | 2.231     | -5.857      | -0.047      | -3.861       | 2.644        | 6.745        | 1.507       | -1.024       |
| 13 | <i>P. aeruginosa</i>    | -0.361      | -3.999      | -1.485      | -1.999         | 3.106     | -7.232      | 1.090       | -0.714       | 4.611        | 6.563        | 1.632       | -1.614       |
| 14 | <i>P. fluorescens</i>   | -4.433      | -2.181      | -8.748      | -6.232         | 0.725     | -4.112      | -1.775      | -4.584       | 0.293        | 0.821        | 1.609       | -2.194       |
| 15 | <i>S. paratyphi B</i>   | -12.900     | -2.007      | -3.826      | -5.466         | -0.123    | -0.700      | 0.281       | -1.889       | 2.123        | 2.920        | -3.913      | 2.063        |
| 16 | <i>S.paratyphi B</i>    | -13.034     | 1.134       | -2.856      | -2.299         | 0.386     | -0.813      | -0.122      | 1.238        | 4.885        | 3.880        | -2.990      | 1.519        |
| 17 | <i>E. sakazaki</i>      | -2.131      | -5.764      | -8.614      | -12.831        | 0.161     | -5.317      | -2.260      | -6.357       | -5.904       | 0.616        | 0.197       | 0.595        |
| 18 | <i>E. sakazaki</i>      | 0.258       | -5.312      | -6.574      | -7.775         | 0.800     | -5.948      | 2.693       | -0.290       | -3.073       | 3.987        | -0.262      | 1.827        |
| 19 | <i>E. cloacae</i>       | -11.432     | 0.301       | -7.090      | -6.626         | -3.934    | -3.861      | -2.344      | 2.458        | 2.316        | 2.175        | -2.773      | 2.211        |
| 20 | <i>E. cloacae</i>       | -13.993     | -5.024      | -16.139     | -9.721         | -2.922    | -4.214      | -4.290      | -3.893       | -4.074       | -1.916       | -6.577      | 0.812        |

## 7. HCA and OPLS-DA results

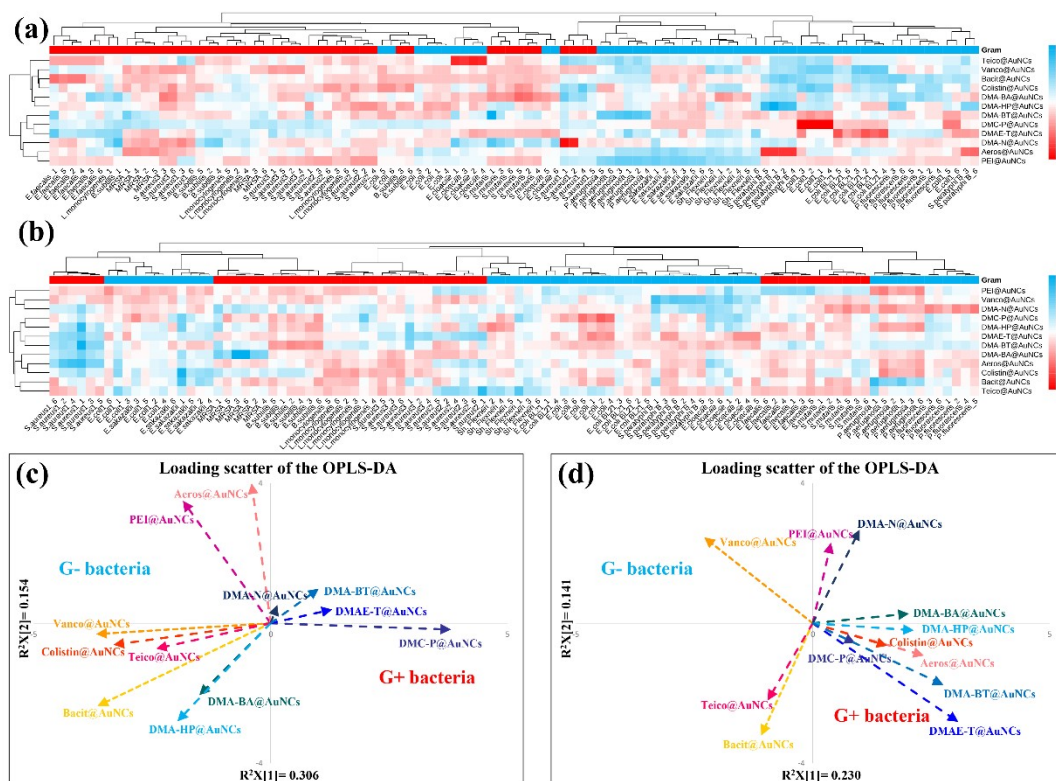

Figure S5. Heatmap and HCA results for the detection of bacterial samples in serum and urine, respectively **(a, b)**; Loading scatter of the OPLS-DA for for the detection of bacterial samples in serum and urine, respectively **(c, d)**.

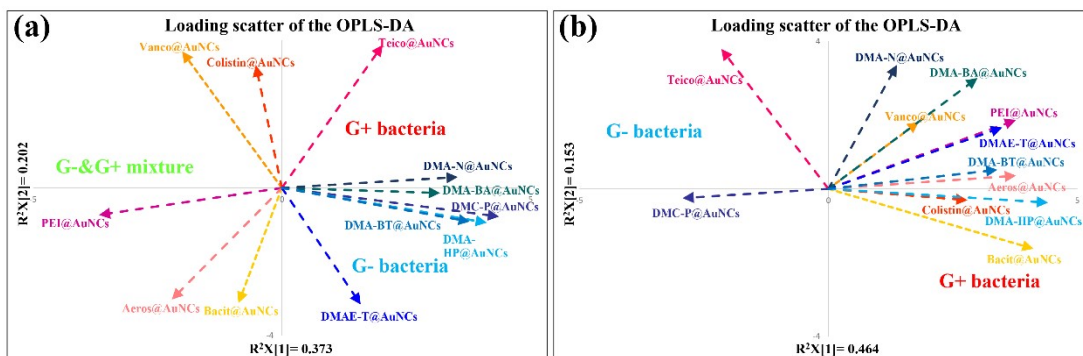

Figure S6. Loading scatter of the OPLS-DA for the detection of mixed bacteria and bacterial samples with gradient concentrations, respectively **(a, b)**.



Table S16. Misclassification table for the training set in the detection of bacterial samples in serum.

| Members          | Correct | S. aureus 1 | S. aureus 2 | S. aureus 3 | MRSA | L. monocytogenes | E. faecalis | B. subtilis | S. mutans | E. coli | E. coli 1 | E. coli BL21 | P. aeruginosa | P. fluorescens | S. paratyphi B | Sh. flexneri | E. sakazakii | E. cloacae |
|------------------|---------|-------------|-------------|-------------|------|------------------|-------------|-------------|-----------|---------|-----------|--------------|---------------|----------------|----------------|--------------|--------------|------------|
| S. aureus 1      | 6       | 100%        | 6           | 0           | 0    | 0                | 0           | 0           | 0         | 0       | 0         | 0            | 0             | 0              | 0              | 0            | 0            | 0          |
| S. aureus 2      | 6       | 100%        | 0           | 6           | 0    | 0                | 0           | 0           | 0         | 0       | 0         | 0            | 0             | 0              | 0              | 0            | 0            | 0          |
| S. aureus 3      | 6       | 100%        | 0           | 0           | 6    | 0                | 0           | 0           | 0         | 0       | 0         | 0            | 0             | 0              | 0              | 0            | 0            | 0          |
| MRSA             | 6       | 100%        | 0           | 0           | 0    | 6                | 0           | 0           | 0         | 0       | 0         | 0            | 0             | 0              | 0              | 0            | 0            | 0          |
| L. monocytogenes | 6       | 100%        | 0           | 0           | 0    | 0                | 6           | 0           | 0         | 0       | 0         | 0            | 0             | 0              | 0              | 0            | 0            | 0          |
| E. faecalis      | 6       | 100%        | 0           | 0           | 0    | 0                | 0           | 6           | 0         | 0       | 0         | 0            | 0             | 0              | 0              | 0            | 0            | 0          |
| B. subtilis      | 6       | 100%        | 0           | 0           | 0    | 0                | 0           | 0           | 6         | 0       | 0         | 0            | 0             | 0              | 0              | 0            | 0            | 0          |
| S. mutans        | 6       | 100%        | 0           | 0           | 0    | 0                | 0           | 0           | 0         | 6       | 0         | 0            | 0             | 0              | 0              | 0            | 0            | 0          |
| E. coli          | 6       | 100%        | 0           | 0           | 0    | 0                | 0           | 0           | 0         | 0       | 6         | 0            | 0             | 0              | 0              | 0            | 0            | 0          |
| E. coli 1        | 6       | 100%        | 0           | 0           | 0    | 0                | 0           | 0           | 0         | 0       | 0         | 6            | 0             | 0              | 0              | 0            | 0            | 0          |
| E. coli BL21     | 6       | 100%        | 0           | 0           | 0    | 0                | 0           | 0           | 0         | 0       | 0         | 0            | 6             | 0              | 0              | 0            | 0            | 0          |
| P. aeruginosa    | 6       | 100%        | 0           | 0           | 0    | 0                | 0           | 0           | 0         | 0       | 0         | 0            | 0             | 6              | 0              | 0            | 0            | 0          |
| P. fluorescens   | 6       | 100%        | 0           | 0           | 0    | 0                | 0           | 0           | 0         | 0       | 0         | 0            | 0             | 0              | 6              | 0            | 0            | 0          |
| S. paratyphi B   | 6       | 100%        | 0           | 0           | 0    | 0                | 0           | 0           | 0         | 0       | 0         | 0            | 0             | 0              | 0              | 6            | 0            | 0          |
| Sh. flexneri     | 6       | 83.33%      | 0           | 1           | 0    | 0                | 0           | 0           | 0         | 0       | 0         | 0            | 0             | 0              | 0              | 0            | 5            | 0          |
| E. sakazakii     | 6       | 100%        | 0           | 0           | 0    | 0                | 0           | 0           | 0         | 0       | 0         | 0            | 0             | 0              | 0              | 0            | 0            | 6          |
| E. cloacae       | 6       | 100%        | 0           | 0           | 0    | 0                | 0           | 0           | 0         | 0       | 0         | 0            | 0             | 0              | 0              | 0            | 0            | 6          |
| Total            | 102     | 99.02%      | 6           | 7           | 6    | 6                | 6           | 6           | 6         | 6       | 6         | 6            | 6             | 6              | 6              | 5            | 6            | 6          |

Table S17. Misclassification table for the testing set in the detection of bacterial samples in serum.

| Verification       | Correc | S. aureus 1 | S. aureus 2 | S. aureus 3 | MRSA | L. monocytogenes | E. faecalis | B. subtilis | S. mutans | E. coli | E. coli 1 | E. coli BL21 | P. aeruginosa | P. fluorescens | S. paratyphi B | Sh. flexneri | E. sakazakii | E. cloacae |
|--------------------|--------|-------------|-------------|-------------|------|------------------|-------------|-------------|-----------|---------|-----------|--------------|---------------|----------------|----------------|--------------|--------------|------------|
| 1 S. aureus 3      | 100%   | 0           | 0           | 1           | 0    | 0                | 0           | 0           | 0         | 0       | 0         | 0            | 0             | 0              | 0              | 0            | 0            | 0          |
| 2 S. aureus 3      | 100%   | 0           | 0           | 1           | 0    | 0                | 0           | 0           | 0         | 0       | 0         | 0            | 0             | 0              | 0              | 0            | 0            | 0          |
| 3 MRSA             | 100%   | 0           | 0           | 0           | 1    | 0                | 0           | 0           | 0         | 0       | 0         | 0            | 0             | 0              | 0              | 0            | 0            | 0          |
| 4 MRSA             | 100%   | 0           | 0           | 0           | 1    | 0                | 0           | 0           | 0         | 0       | 0         | 0            | 0             | 0              | 0              | 0            | 0            | 0          |
| 5 L. monocytogenes | 100%   | 0           | 0           | 0           | 0    | 1                | 0           | 0           | 0         | 0       | 0         | 0            | 0             | 0              | 0              | 0            | 0            | 0          |
| 6 L. monocytogenes | 100%   | 0           | 0           | 0           | 0    | 1                | 0           | 0           | 0         | 0       | 0         | 0            | 0             | 0              | 0              | 0            | 0            | 0          |
| 7 E. faecalis      | 100%   | 0           | 0           | 0           | 0    | 0                | 1           | 0           | 0         | 0       | 0         | 0            | 0             | 0              | 0              | 0            | 0            | 0          |
| 8 E. faecalis      | 100%   | 0           | 0           | 0           | 0    | 0                | 1           | 0           | 0         | 0       | 0         | 0            | 0             | 0              | 0              | 0            | 0            | 0          |
| 9 S. mutans        | 100%   | 0           | 0           | 0           | 0    | 0                | 0           | 0           | 1         | 0       | 0         | 0            | 0             | 0              | 0              | 0            | 0            | 0          |
| 10 E. coli         | 100%   | 0           | 0           | 0           | 0    | 0                | 0           | 0           | 0         | 1       | 0         | 0            | 0             | 0              | 0              | 0            | 0            | 0          |
| 11 E. coli         | 0%     | 0           | 0           | 0           | 0    | 0                | 0           | 0           | 0         | 0       | 0         | 0            | 0             | 0              | 0              | 0            | 0            | 0          |
| 12 P. aeruginosa   | 100%   | 0           | 0           | 0           | 0    | 0                | 0           | 0           | 0         | 0       | 0         | 0            | 1             | 0              | 0              | 0            | 0            | 0          |
| 13 P. aeruginosa   | 100%   | 0           | 0           | 0           | 0    | 0                | 0           | 0           | 0         | 0       | 0         | 0            | 1             | 0              | 0              | 0            | 0            | 0          |
| 14 P. fluorescens  | 100%   | 0           | 0           | 0           | 0    | 0                | 0           | 0           | 0         | 0       | 0         | 0            | 0             | 1              | 0              | 0            | 0            | 0          |
| 15 S. paratyphi B  | 100%   | 0           | 0           | 0           | 0    | 0                | 0           | 0           | 0         | 0       | 0         | 0            | 0             | 0              | 1              | 0            | 0            | 0          |
| 16 S. paratyphi B  | 100%   | 0           | 0           | 0           | 0    | 0                | 0           | 0           | 0         | 0       | 0         | 0            | 0             | 0              | 0              | 0            | 0            | 0          |
| 17 E. sakazakii    | 100%   | 0           | 0           | 0           | 0    | 0                | 0           | 0           | 0         | 0       | 0         | 0            | 0             | 0              | 0              | 0            | 1            | 0          |
| 18 E. sakazakii    | 100%   | 0           | 0           | 0           | 0    | 0                | 0           | 0           | 0         | 0       | 0         | 0            | 0             | 0              | 0              | 0            | 1            | 0          |
| 19 E. cloacae      | 100%   | 0           | 0           | 0           | 0    | 0                | 0           | 0           | 0         | 0       | 0         | 0            | 0             | 0              | 0              | 0            | 0            | 1          |
| 20 E. cloacae      | 100%   | 0           | 0           | 0           | 0    | 0                | 0           | 0           | 0         | 0       | 0         | 0            | 0             | 0              | 0              | 0            | 0            | 1          |

Table S18. Misclassification table for the training set in the detection of mixed bacteria.

| Members        | Correct | 3+4  | 4+7 | 7+8 | 11+14 | 15+16 | 11+16 | 4+14 | 7+15 | 8+16 | 3+4+7+11+14+15 |
|----------------|---------|------|-----|-----|-------|-------|-------|------|------|------|----------------|
| 3+4            | 6       | 100% | 6   | 0   | 0     | 0     | 0     | 0    | 0    | 0    | 0              |
| 4+7            | 6       | 100% | 0   | 6   | 0     | 0     | 0     | 0    | 0    | 0    | 0              |
| 7+8            | 6       | 100% | 0   | 0   | 6     | 0     | 0     | 0    | 0    | 0    | 0              |
| 11+14          | 6       | 100% | 0   | 0   | 0     | 6     | 0     | 0    | 0    | 0    | 0              |
| 15+16          | 6       | 100% | 0   | 0   | 0     | 0     | 6     | 0    | 0    | 0    | 0              |
| 11+16          | 6       | 100% | 0   | 0   | 0     | 0     | 0     | 6    | 0    | 0    | 0              |
| 4+14           | 6       | 100% | 0   | 0   | 0     | 0     | 0     | 0    | 6    | 0    | 0              |
| 7+15           | 6       | 100% | 0   | 0   | 0     | 0     | 0     | 0    | 0    | 6    | 0              |
| 8+16           | 6       | 100% | 0   | 0   | 0     | 0     | 0     | 0    | 0    | 0    | 6              |
| 3+4+7+11+14+15 | 6       | 100% | 0   | 0   | 0     | 0     | 0     | 0    | 0    | 0    | 6              |
| Total          | 60      | 100% | 6   | 6   | 6     | 6     | 6     | 6    | 6    | 6    | 6              |

Table S19. Misclassification table for the training set in the detection of bacteria with gradient concentrations.

| Members | Correct | S1    | S2 | S3 | S4 | S5 | S6 | S7 | S8 | S9 | E1 | E2 | E3 | E4 | E5 | E6 | E7 | E8 | E9 |
|---------|---------|-------|----|----|----|----|----|----|----|----|----|----|----|----|----|----|----|----|----|
| S1      | 6       | 100%  | 6  | 0  | 0  | 0  | 0  | 0  | 0  | 0  | 0  | 0  | 0  | 0  | 0  | 0  | 0  | 0  | 0  |
| S2      | 6       | 100%  | 0  | 6  | 0  | 0  | 0  | 0  | 0  | 0  | 0  | 0  | 0  | 0  | 0  | 0  | 0  | 0  | 0  |
| S3      | 6       | 100%  | 0  | 0  | 6  | 0  | 0  | 0  | 0  | 0  | 0  | 0  | 0  | 0  | 0  | 0  | 0  | 0  | 0  |
| S4      | 6       | 100%  | 0  | 0  | 0  | 6  | 0  | 0  | 0  | 0  | 0  | 0  | 0  | 0  | 0  | 0  | 0  | 0  | 0  |
| S5      | 6       | 50%   | 0  | 0  | 0  | 0  | 6  | 1  | 0  | 0  | 0  | 0  | 0  | 0  | 0  | 0  | 0  | 0  | 0  |
| S6      | 6       | 100%  | 0  | 0  | 0  | 0  | 0  | 6  | 0  | 0  | 0  | 0  | 0  | 0  | 0  | 0  | 0  | 0  | 0  |
| S7      | 6       | 100%  | 0  | 0  | 0  | 0  | 0  | 0  | 6  | 0  | 0  | 0  | 0  | 0  | 0  | 0  | 0  | 0  | 0  |
| S8      | 6       | 100%  | 0  | 0  | 0  | 0  | 0  | 0  | 0  | 6  | 0  | 0  | 0  | 0  | 0  | 0  | 0  | 0  | 0  |
| S9      | 6       | 100%  | 0  | 0  | 0  | 0  | 0  | 0  | 0  | 0  | 6  | 0  | 0  | 0  | 0  | 0  | 0  | 0  | 0  |
| E1      | 6       | 100%  | 0  | 0  | 0  | 0  | 0  | 0  | 0  | 0  | 0  | 6  | 0  | 0  | 0  | 0  | 0  | 0  | 0  |
| E2      | 6       | 100%  | 0  | 0  | 0  | 0  | 0  | 0  | 0  | 0  | 0  | 0  | 6  | 0  | 0  | 0  | 0  | 0  | 0  |
| E3      | 6       | 100%  | 0  | 0  | 0  | 0  | 0  | 0  | 0  | 0  | 0  | 0  | 0  | 6  | 0  | 0  | 0  | 0  | 0  |
| E4      | 6       | 100%  | 0  | 0  | 0  | 0  | 0  | 0  | 0  | 0  | 0  | 0  | 0  | 0  | 6  | 0  | 0  | 0  | 0  |
| E5      | 6       | 100%  | 0  | 0  | 0  | 0  | 0  | 0  | 0  | 0  | 0  | 0  | 0  | 0  | 0  | 6  | 0  | 0  | 0  |
| E6      | 6       | 100%  | 0  | 0  | 0  | 0  | 0  | 0  | 0  | 0  | 0  | 0  | 0  | 0  | 0  | 0  | 6  | 0  | 0  |
| E7      | 6       | 100%  | 0  | 0  | 0  | 0  | 0  | 0  | 0  | 0  | 0  | 0  | 0  | 0  | 0  | 0  | 0  | 6  | 0  |
| E8      | 6       | 100%  | 0  | 0  | 0  | 0  | 0  | 0  | 0  | 0  | 0  | 0  | 0  | 0  | 0  | 0  | 0  | 0  | 6  |
| E9      | 6       | 100%  | 0  | 0  | 0  | 0  | 0  | 0  | 0  | 0  | 0  | 0  | 0  | 0  | 0  | 0  | 0  | 0  | 6  |
| Total   | 108     | 96.3% | 6  | 7  | 6  | 6  | 6  | 6  | 6  | 6  | 6  | 6  | 6  | 5  | 6  | 6  | 7  | 6  | 6  |

Table S20. Variable importance for projection (VIP) values of OPLS-DA for the detection of bacterial samples in the different situation.

|                | Water     |            | Serum     |            | Urine     |            | Mixture   |            | Gradient concentration |            |
|----------------|-----------|------------|-----------|------------|-----------|------------|-----------|------------|------------------------|------------|
|                | VIP value | SE of mean | VIP value              | SE of mean |
| Vanco@AuNCs    | 0.977     | 0.043      | 1.025     | 0.076      | 0.982     | 0.124      | 0.974     | 0.077      | 1.065                  | 0.053      |
| Bacit@AuNCs    | 0.981     | 0.052      | 0.980     | 0.103      | 1.065     | 0.096      | 1.105     | 0.215      | 1.021                  | 0.058      |
| Aeros@AuNCs    | 1.011     | 0.062      | 0.949     | 0.100      | 1.016     | 0.104      | 1.089     | 0.132      | 0.965                  | 0.044      |
| Colistin@AuNCs | 1.010     | 0.059      | 1.040     | 0.254      | 0.974     | 0.084      | 1.042     | 0.144      | 1.026                  | 0.104      |
| PEI@AuNCs      | 1.000     | 0.078      | 0.992     | 0.100      | 1.037     | 0.056      | 0.995     | 0.288      | 0.995                  | 0.042      |
| Teico@AuNCs    | 0.977     | 0.071      | 0.993     | 0.160      | 1.081     | 0.041      | 0.990     | 0.091      | 0.999                  | 0.129      |
| DMC-P@AuNCs    | 1.039     | 0.055      | 0.994     | 0.081      | 1.068     | 0.115      | 0.926     | 0.094      | 1.054                  | 0.074      |
| DMAE-T@AuNCs   | 1.036     | 0.081      | 1.036     | 0.064      | 0.981     | 0.072      | 1.104     | 0.098      | 1.065                  | 0.059      |
| DMA-BA@AuNCs   | 1.115     | 0.105      | 1.072     | 0.084      | 0.945     | 0.193      | 0.912     | 0.177      | 1.021                  | 0.139      |
| DMA-HP@AuNCs   | 1.045     | 0.077      | 0.929     | 0.054      | 0.999     | 0.118      | 1.040     | 0.072      | 0.925                  | 0.077      |
| DMA-N@AuNCs    | 0.998     | 0.102      | 1.063     | 0.146      | 1.012     | 0.095      | 0.929     | 0.201      | 1.089                  | 0.042      |
| DMA-BT@AuNCs   | 1.054     | 0.066      | 1.084     | 0.084      | 1.031     | 0.179      | 0.982     | 0.077      | 1.033                  | 0.019      |
